25 **Abstract**

26 **Introduction:** Adolescence is a stage of physical, psychological, and social changes,  
27 which determine the personality of the individual, which can be influenced by physical  
28 appearance because of alterations in the skin texture of adolescents. Patients with  
29 dermatosis have a higher risk of developing depression, anxiety and suicidal ideas. Acne  
30 is an important factor for quality of life and affects adolescents both physically and  
31 psychosocially. **Objective :** To determine the factors associated with the repercussions of  
32 acne in adolescents in Honduras. **Methodology:** Analytical cross-sectional study. The  
33 Cardiff Acne Disability Index (CADI) scale was used through a questionnaire in Google  
34 Forms. Descriptive and analytical statistics were obtained. **Results:** Of the 3,272 young  
35 participants, with respect to quality of life, 25.8% (845) had medium or high  
36 repercussions, 5.3% were very depressed by the appearance of their skin in the month  
37 prior to filling out the questionnaire. When multivariate analysis was performed, it was  
38 found that those who had medium or high repercussions due to acne were women (RPa:  
39 1.33; 95%CI: 1.20-1.48; p-value<0.001), those of indigenous ethnicity (RPa: 1.36;  
40 95%CI: 1.05-1.75; p-value=0.019), those who had scars on the face (RPa: 13.08; 95%CI:  
41 10.02-17.05; p-value<0.001) or those who had the father (RPa: 1.13; 95%CI: 1.01-1.25;  
42 p-value=0.031) or siblings with acne (RPa: 1.16; 95%CI: 1.04-1.28; p-value=0.005).  
43 **Conclusion:** It was found that gender, belonging to an indigenous ethnicity, having scars  
44 on the face or that having a close relative who had suffered from acne were associated  
45 with medium or high repercussions on the quality of life; it is important to take care of  
46 acne in this stage of life to avoid repercussions in adulthood.

47

48 **Keywords:** Acne Vulgaris, Adolescent, Central America, Quality of Life, Scar,  
49 Honduras.

## 50 **Introduction**

51 Acne is a chronic inflammatory disease of the pilosebaceous unit, involving  
52 increased androgen-induced sebum production, abnormal keratinization of the  
53 pilosebaceous duct and an immune response to colonization by *Cutibacterium acnes*  
54 (formerly *Propionibacterium acnes*) (1, 2). Acne is estimated to affect 9.4% of the world's  
55 population, making it the eighth most prevalent disease worldwide, affecting 90% of  
56 adolescents and young adults (3, 4).

57 It is known that adolescence is a crucial period for the development of social and  
58 emotional skills important for mental well-being, such as adopting healthy sleep patterns,  
59 exercising regularly, developing skills to maintain interpersonal relationships, coping  
60 with difficult situations, solving problems and learning to manage emotions. Therefore,  
61 it is important to have a favorable and protective environment in the family, school and  
62 community in general (5). The transition from childhood to adolescence entails  
63 physiological and psychological changes in the child (6), to which is now added the  
64 mental challenges generated by the COVID-19 pandemic, and it is important that  
65 adolescents receive the physical and mental care they need to develop, grow and thrive  
66 (7).

67 The visibility, chronicity and recurrent course of many skin lesions contribute to  
68 various psychosocial disorders, consequences of skin diseases. Patients with dermatoses  
69 are at increased risk of developing depression, anxiety, and suicidal ideation (4, 8, 9). In  
70 our society today, if certain social parameters are not met in physical appearance,  
71 adolescents suffer from bullying by their peers, acne can lead to emotional stress and the  
72 impact on quality of life can be significant (10).

73           There are studies that show the importance of acne, blemishes, scars and others  
74   that could have sequelae on the skin in adolescents (11), however, most of these studies  
75   have been conducted in Europe (12), the United States (13), India (14) and developed  
76   countries, in which a very important role is given to mental health and its influence on  
77   public health in general. On the other hand, in Latin American countries there are few  
78   studies that report this situation, as in Argentina and Mexico, but they were carried out in  
79   the pre-pandemic period (15, 16).

80           Among the few studies published in Honduras on the subject, in 2016 "Prevalence  
81   of dermatoses in school-aged children" was published, finding a prevalence of acne of  
82   1.2% (17), to date no studies have been published in adolescent population related to  
83   acne. Therefore, the general objective is to determine the factors associated with the  
84   repercussions of acne in adolescents in Honduras.

## 85   **METHODOLOGY**

86           The Scientific Research Unit (UIC) of the Faculty of Medical Sciences (FMC) -  
87   UNAH, implemented the methodology of national research on priority health problems  
88   in low-resource settings (18). The physicians who participated in the project were 65  
89   eighth year medical students (MSS), who were trained in research methodology by the  
90   UIC-FCM, in dermatology with emphasis on acne and in quality of life by professors of  
91   the postgraduate courses of Dermatology and Psychiatry UNAH. After training, the  
92   surveyors were distributed in 16 departments of the country; this distribution was done  
93   by sampling in hospitals and primary care units, and information was collected from July  
94   to August 2020. Each interviewer provided an average of 58 questionnaires, each form  
95   had an average response time of 10 minutes.

96

97 To determine whether the number of respondents was sufficient to determine the  
98 association between the variables, the statistical power calculation was performed, where  
99 the only crosses that did not reach adequate power were the age of 13 years (power: 6%),  
100 for white ethnicity (power: 69%) and for whether the siblings had suffered from acne  
101 (power: 4%); therefore, only these 3 crosses should be taken with caution.

102 The study design was cross-sectional, analytical and multicenter, with a non-  
103 random snowball sample, which included 3325 young people aged 12-17 years; in the  
104 process of purging the database, 53 records were eliminated, 51 adolescents did not sign  
105 the informed consent form, and 2 records were not filled out in their entirety. The  
106 adolescents were children or family members within the staff of the care centers at where  
107 there were doctors doing. They were provided with the Google Forms link, and they  
108 socialized it with their peers. This type of survey was conducted due to the onset of the  
109 pandemic and considering the biosecurity measures, the restrictions of movement adopted  
110 by the country, the protocol, the safety of the surveyors and respondents. Therefore, it  
111 was adapted to online questionnaire and informed assent was obtained from each  
112 participant.

113 Before starting the project, ethical care was ensured, so the protocol was submitted  
114 to the FCM Biomedical Research Ethics Committee (CEIB), approval code: 010-2020,  
115 which was approved in the session of March 20, 2020. As part of their training, the MSS  
116 completed the online course on Good Clinical Practices The Global Health Network  
117 ([www.tghn.org](http://www.tghn.org)).

118 An instrument was prepared with the following sections: sociodemographic data  
119 including general data (age, sex, schooling, origin, ethnicity), as well as related factors  
120 and personal pathological history. To help determine whether they suffered from acne,

121 two images were presented for the adolescent to identify their type of acne, inflammatory  
122 or non-inflammatory (comedogenic), and the Dermatological Questionnaire of Quality of  
123 Life in Adolescents (The Cardiff Acne Disability Index) was included (19).

124 Motley and Finlay described a brief questionnaire designed to assess disability  
125 caused by acne. The questionnaire adds a patient-oriented dimension to medical records,  
126 highlights patients with unusually high levels of disability, and increases the relevant  
127 information on which we base therapeutic decisions (20).

128 The Cardiff Acne Disability Index (CADI) is a questionnaire designed to measure  
129 the quality of life of adolescents and young adults with acne, we used the Spanish version  
130 validated in 2018, which was validated by Cardiff University. (19). As of October 2021,  
131 a change in wording was made (21).

132 When all the information was available, the database was cleaned and the  
133 variables were labeled and ready for analysis, which was performed with the statistical  
134 program Stata (version 16). First, we proceeded to generate three tables describing the  
135 population and their condition of acne, where we obtained the frequencies and  
136 percentages of the categorical variables, as well as the mean and interquartile range of  
137 age. Then the last tables were elaborated, where the RPc (crude prevalence ratios), RPa  
138 (adjusted prevalence ratios), 95% confidence intervals (95% confidence intervals) and p-  
139 values were obtained; all were obtained with the generalized linear models (Poisson  
140 family, log link function and models for robust variances). For a variable to pass from the  
141 crude model to the adjusted model, it had to have a p value <0.05; this same cut-off point  
142 was used to determine the final statistical significance.

143

144           **RESULTS**

145           Of the 3272 respondents, 60.0% (1960) were female, the most frequent age was  
146   16 years (25.1%), the median age was 15 years (interquartile range: 14-16 years),  
147   mestizos were the majority (74.4%) and they stated that their mother (20.2%), father  
148   (16.9%), brothers (37.7%), cousins (39.6%) and uncles (20.4%) had suffered from acne  
149   in their family.

150           **Table 1**

151           **Table 1.** Characteristics of adolescents surveyed in Honduras, n=3272.

| <b>Variable</b>                | <b>Frequency</b> | <b>Percentage</b> |
|--------------------------------|------------------|-------------------|
| <b>Sex</b>                     |                  |                   |
| Male                           | 1306             | 40,0              |
| Female                         | 1960             | 60,0              |
| <b>Age (years old)</b>         |                  |                   |
| 12 years                       | 190              | 5,8               |
| 13 years                       | 353              | 10,8              |
| 14 years                       | 454              | 13,9              |
| 15 years                       | 683              | 20,9              |
| 16 years                       | 820              | 25,1              |
| 17 years                       | 772              | 23,6              |
| Median and interquartile range | 15 years         | 14-16 years       |
| <b>Educational level</b>       |                  |                   |
| Pre-basic or basic             | 1415             | 45,7              |
| Intermediate level             | 1681             | 54,3              |
| <b>Ethnic group</b>            |                  |                   |
| Mestizos                       | 2391             | 74,4              |
| White                          | 342              | 10,6              |
| Other                          | 378              | 11,7              |
| Indigenous                     | 105              | 3,3               |
| <b>Family with acne*</b>       |                  |                   |

|                                    |      |      |
|------------------------------------|------|------|
| Mother                             | 658  | 20,2 |
| Father                             | 553  | 16,9 |
| Brothers                           | 1229 | 37,7 |
| Cousins                            | 1293 | 39,6 |
| Uncles                             | 666  | 20,4 |
| <b>You have scars on your face</b> |      |      |
| No                                 | 1701 | 52,0 |
| yes                                | 1571 | 48,0 |

152

153

154

\*This section does not add up to 100% since the questions were asked in a way that could have multiple answers.

155

156

157

158

When asked if they currently had acne, 52.5% (1717) responded that, if they did, of those who had acne, 44.3% (761) had it already more than 6 months ago, 19.7% (339) had inflammatory type acne and as for severity, 4.8% (82) and 25.7% (441) had severe and moderate acne, respectively. **Table 2**

159

160

**Table 2.** Current acne sufferers among adolescent respondents in Honduras: characteristics and impact, n=3272.

| Variable                             | Frequency | Percentage |
|--------------------------------------|-----------|------------|
| <b>Currently suffering from acne</b> |           |            |
| No                                   | 1555      | 47,5       |
| Yes                                  | 1717      | 52,5       |
| <b>Months suffering from acne*</b>   |           |            |
| < 1 month                            | 224       | 13,1       |
| 1-3 months                           | 452       | 26,3       |
| >3 months and up to 6 months         | 280       | 16,3       |
| > 6 months                           | 761       | 44,3       |
| <b>It is inflammatory acne*.</b>     |           |            |
| No                                   | 1378      | 80,3       |
| Yes                                  | 339       | 19,7       |
| <b>Severity of acne*</b>             |           |            |
| Light                                | 1194      | 69,5       |



|        |     |      |
|--------|-----|------|
| Mild   | 441 | 25,7 |
| Severe | 82  | 4,8  |

161

162 \*These questions have only been answered by those who mentioned that they had acne.

163

164 According to the impact test questions, 4.4% said that they felt very much  
 165 aggressive, frustrated or embarrassed in the past month, and 3.4% thought that the acne  
 166 they had in the past month interfered with their daily social life, social events or their  
 167 relationship with people of the opposite sex. In addition, 5.3% were very depressed about  
 168 the appearance of their skin in the past month and 25.8% (845) had medium or high  
 169 repercussions from acne. Table 3

170 **Table 3.** Disaggregated and global responses to the impact of acne among adolescent  
 171 respondents in Honduras, n=3272.

| Questions                                                                                                                                               | Answers                                                                                                                                            |
|---------------------------------------------------------------------------------------------------------------------------------------------------------|----------------------------------------------------------------------------------------------------------------------------------------------------|
| 1. As a result of having acne, have you been aggressive, frustrated or embarrassed during the past month?                                               | In fact, very much = 4.4%.<br>Very much= 8.5%.<br>A little = 21.0%.<br>Not at all = 66.1%.                                                         |
| 2. Do you think the acne you had last month interfered with your daily social life, social events or your relationship with people of the opposite sex? | Very much; affected all activities=3.4%.<br>Moderately; in most activities=7.5%.<br>Sometimes or only in some activities=19.4%<br>Not at all=69.7% |
| 3. In the past month, have you stopped changing clothes or wearing your bathing suit in public places because of acne?                                  | All the time=3.2%<br>Most of the time=5,1%.<br>Sometimes=12.4%<br>Not at all=79.2%                                                                 |
| 4. How did the appearance of your skin make you feel last month?                                                                                        | Very depressed and sad=5.3%.<br>Generally worried=12,0%.<br>Sometimes worried=22.3%<br>Not bothered=60.4%                                          |
| 5. Tell us how bad you think your acne is now:                                                                                                          | The worst it could be=2.5%.<br>A major problem=17,2%.<br>A minor problem=23.1%<br>No problem=57,2%                                                 |

Degree of acne affect  
None=47.5%  
Low=26.7%  
Medium=18.9%  
High=6.9%

172

173 When bivariate analysis was performed, it was found that those who had medium or high  
174 repercussions due to acne were females ( $p<0.001$ ), those who were 14 years old  
175 ( $p=0.022$ ), 15 years old ( $p<0.001$ ), 16 years old ( $p<0.001$ ) or 17 years old ( $p<0.001$ ),  
176 those of middle level ( $p<0, 001$ ), those who had scars from acne ( $p<0.001$ ) or those who  
177 had mother ( $p<0.001$ ), father ( $p<0.001$ ) or siblings with acne ( $p<0.001$ ), on the contrary,  
178 those of other ethnicities had less impact from acne ( $p<0.001$ ). **Table 4**

179 **Table 4.** Bivariate analysis of factors associated with the impact of acne in adolescents in  
180 Honduras, n=3272.

| Variable                   | Acne repercussions |                | Bivariate analysis      |
|----------------------------|--------------------|----------------|-------------------------|
|                            | None or low        | Medium or high | RPc (95%CI) p-value     |
| <b>Gender</b>              |                    |                |                         |
| Male                       | 1017 (77,9)        | 289 (22,1)     | Comparison category     |
| Female                     | 1405 (71,7)        | 555 (28,3)     | 1,27 (1,13-1,45) <0,001 |
| <b>Age (years old)</b>     |                    |                |                         |
| 12 years old               | 165 (86,4)         | 25 (13,2)      | Comparison category     |
| 13 years old               | 305 (86,4)         | 48 (13,6)      | 1,03 (0,66-1,62) 0,886  |
| 14 years old               | 358 (78,9)         | 96 (21,1)      | 1,61 (1,07-2,41) 0,022  |
| 15 years old               | 468 (68,5)         | 215 (31,5)     | 2,39 (1,63-3,50) <0,001 |
| 16 years old               | 582 (71,0)         | 238 (29,0)     | 2,21 (1,51-3,23) <0,001 |
| 17 years old               | 549 (71,1)         | 223 (28,9)     | 2,20 (1,50-3,21) <0,001 |
| <b>Levels of education</b> |                    |                |                         |
| Pre-basic or basic         | 1112 (78,6)        | 303 (21,4)     | Comparison category     |
| Medium level               | 1191 (70,9)        | 490 (29,1)     | 1,36 (1,20-1,54) <0,001 |
| <b>Ethnicity</b>           |                    |                |                         |
| Mestizos                   | 1737 (72,7)        | 654 (27,3)     | Comparison category     |
| White                      | 258 (75,4)         | 84 (24,6)      | 0,90 (0,74-1,09) 0,284  |

|                          |             |            |                            |
|--------------------------|-------------|------------|----------------------------|
| Other                    | 310 (82,0)  | 68 (18,0)  | 0,66 (0,53-0,82) <0,001    |
| Indigenous               | 72 (68,6)   | 33 (31,4)  | 1,15 (0,86-1,54) 0,348     |
| <b>Family with acne*</b> |             |            |                            |
| Mother                   | 409 (62,2)  | 249 (37,8) | 1,65 (,147-1,87) <0,001    |
| Father                   | 323 (58,4)  | 230 (41,6) | 1,83 (1,62-2,07) <0,001    |
| Brothers                 | 761 (61,9)  | 468 (38,1) | 2,06 (1,83-2,31) <0,001    |
| Cousins                  | 935 (72,3)  | 358 (27,7) | 1,12 (0,99-1,26) 0,057     |
| Uncles                   | 480 (72,1)  | 186 (27,9) | 1,10 (0,96-1,26) 0,174     |
| <b>Scars on face</b>     |             |            |                            |
| No                       | 1644 (96,7) | 57 (3,3)   | Comparison category        |
| Yes                      | 783 (49,8)  | 788 (50,2) | 14,97 (11,54-19,41) <0,001 |

181

182 \*Only the responses of those who, if they suffered, are shown; for the bivariate analysis, they  
 183 are always compared with family members who did not suffer. RPc (crude prevalence ratios),  
 184 95% CI95% (95% confidence intervals) and p-values were obtained with generalized linear  
 185 models (Poisson family, log link function and models for robust variances).

186 When performing the multivariate analysis, it was found that those who had medium or  
 187 high repercussions due to acne were women (RPa: 1.33; 95%CI: 1.20-1.48; p-  
 188 value<0.001), those of indigenous ethnicity (RPa: 1.36; 95%CI: 1.05-1.75; p-  
 189 value=0.019), those who had scars on the face (RPa: 13.08; 95%CI: 10.02-17.05; p-  
 190 value<0.001) or those who had the father (RPa: 1.13; 95%CI: 1.01-1.25; p-value=0.031)  
 191 or siblings with acne (RPa: 1.16; 95%CI: 1.04-1.28; p-value=0.005). Table 5

192 **Table 5.** Multivariate analysis of factors associated with acne repercussions in adolescents in  
 193 Honduras, n=3272.

| Variable      | RPc (95%CI) p-value     |
|---------------|-------------------------|
| <b>Gender</b> |                         |
| Male          | Comparison category     |
| Female        | 1,33 (1,20-1,48) <0,001 |

| <b>Age (years old)</b>   |                            |
|--------------------------|----------------------------|
| 12 years old             | Comparison category        |
| 13 years old             | 0,83 (0,57-1,22) 0,345     |
| 14 years old             | 1,05 (0,75-1,48) 0,768     |
| 15 years old             | 1,37 (0,99-1,89) 0,055     |
| 16 years old             | 1,25 (0,91-1,72) 0,171     |
| 17 years old             | 1,25 (0,91-1,73) 0,170     |
| <b>Ethnicity</b>         |                            |
| Mestizos                 | Comparison category        |
| White                    | 0,99 (0,84-1,17) 0,914     |
| Others                   | 0,86 (0,71-1,04) 0,112     |
| Indigenous               | 1,36 (1,05-1,75) 0,019     |
| <b>Family with acne*</b> |                            |
| Mother                   | 1,05 (0,93-1,17) 0,419     |
| Father                   | 1,13 (1,01-1,25) 0,031     |
| Brothers                 | 1,16 (1,04-1,28) 0,005     |
| <b>Scars on face</b>     |                            |
| No                       | Comparison category        |
| Yes                      | 13,08 (10,02-17,05) <0,001 |

---

194

195 The RPa (adjusted prevalence ratios), 95% confidence intervals (95% confidence intervals) and  
196 p-values were obtained with the generalized linear models (Poisson family, log link function  
197 and models for robust variances). Educational level was not included in the final model  
198 because it expressed the same as age, and variables that did not have a  $p < 0.05$  in the bivariate  
199 model were not included.

200

## 201 **Discussion**

202 The objective of the study was to determine the factors associated with the  
203 repercussions of acne in adolescents aged 12-17 years in Honduras, since there is no  
204 national data available. The only study on the subject found acne in eighth place among

205 the most frequent dermatoses, with 1.2% in 59/15002 school-age children (17). A  
206 systematic review that included the opinions and experiences of people with acne vulgaris  
207 in 6 countries reported that the physical, psychological and social impact was common  
208 and often generated problems in forming new relationships and maintaining current ones  
209 (22).

210 Acne is an important factor for quality of life and affects adolescents both  
211 physically and psychosocially, they may have difficulties in establishing social  
212 relationships during this period, especially when so much importance is given to external  
213 appearance (23). In this study we found that one out of four young people perceived  
214 medium to high repercussions from acne on their face, knowing that skin conditions of  
215 varying severity can affect the quality of life of patients and have psychiatric  
216 consequences (24), Hazarika and Archana found facial acne as a single site involvement,  
217 this being the most common type (60%), but also with multi-site involvement (face, chest  
218 and back together) in 37% of cases, 75% had varying degrees of acne scarring, while  
219 post-acne hyperpigmentation was observed in 79% of cases (25). In Europe through an  
220 online survey on perceptions and management of acne, most people considered their acne  
221 (all stages of severity) to be either not a problem or a minor problem, although 29.7%  
222 considered it a major problem or burden (26).

223 We found in this study that females had more repercussions due to acne, a study  
224 in high school adolescents in Egypt, which included 994 students, found an overall  
225 prevalence of acne vulgaris of 33.5%, the mean age was  $16.84 \pm 0.87$ , this being more  
226 common among females, with the mild form predominating, followed by moderate and  
227 severe with 6%. The CADI score was significantly related to disease grade and was  
228 highest among those with severe grade, followed by moderate and finally mild disease  
229 grade (27). Bosio et al. observed that the DLQI was higher in males than in females (15),

230 contrasting our results with those found in this study, where women have a greater impact  
231 on quality of life due to acne. Therefore, this indicates that the suffering of this disease  
232 may vary according to the population, so studies should be done for each country or  
233 region.

234 Singh reported that "feelings of embarrassment and interference with social  
235 activities" scored significantly higher for women in a study of 1392 subjects with acne,  
236 using the Dermatologic Life Quality Index (DLQI) and the Cardiff Acne Disability Index  
237 (CADI) (28), the strongest association was facial scarring, which resulted in the highest  
238 frequency of acne-related repercussions, knowing that acne vulgaris can cause permanent  
239 physical scarring, negatively affect quality of life and self-image, and has been associated  
240 with higher rates of anxiety, depression and suicidal ideation (29). In Egypt, a study on  
241 the severity and impact on quality of life and self-esteem among adolescents according  
242 to the CADI score showed that 48.96% of students with clinically confirmed acne  
243 experienced a mild level of disability, while 11.46% of students with acne had a severe  
244 level of disability, low self-esteem was significantly more prevalent among females than  
245 males (30).

246 Acne vulgaris appears to share the same pathogenesis regardless of race or  
247 ethnicity but has different clinical presentations. In darker skin phototypes, there appears  
248 to be a greater subclinical inflammatory response, even in noninflammatory lesions,  
249 which is thought to trigger an exaggerated post inflammatory hyperpigmentation (PIH)  
250 response and keloid scarring (31), this study found that adolescents of indigenous  
251 ethnicity had fewer repercussions from acne. Among the adolescents studied aged 12- 17  
252 years, moreover, those who had a parent or siblings with acne also had more acne-related  
253 repercussions, knowing that positive family history is a strong predisposing factor in  
254 influencing acne presentation, severity and scarring (32). Parental acne was significantly

255 associated with acne presentation and moderate/severe acne, while sibling acne was  
256 significantly associated with grade 3/4 scarring (33). A systematic review of the  
257 epidemiology of acne vulgaris showed a strong association between family history, age,  
258 BMI, and skin type and acne presentation or severity in multiple studies (34). A cross-  
259 sectional online survey study of individuals aged 15-24 years in Belgium, Czech and  
260 Slovak Republic, France, Italy, Poland, and Spain (n = 10,521) showed that a history of  
261 maternal or paternal acne was associated with an increased likelihood of acne (35).  
262 Among the risk factors correlated with an increased likelihood of scarring were acne  
263 severity, time between acne onset, first effective treatment, recurrent acne, and male sex  
264 (36). A study in a group of 15- to 35-year-olds reported that acne outbreaks located on  
265 the face were problematic for 81% of the study population (regardless of sex). Females  
266 experienced psychological distress more frequently than males (37). Jerome Kaikati et al.  
267 in a study conducted in Lebanon reported that acne creates a social barrier and is  
268 intensified in women of childbearing age (38). Therefore, people need support to  
269 understand the long-term management of acne, to develop control over acne and its  
270 treatments, to recognize the impact (22).

271 **Limitations:** The collection of information was designed to be done in person in public  
272 middle schools throughout the country, however, due to the quarantine for the COVID-  
273 19 pandemic, it was modified and a Google Forms instrument was used, this through a  
274 non-random snowball sampling. It is in this context that the schools were forced to be at  
275 home, with restricted mobility and other characteristics of the pandemic. All this together  
276 could have had a bias at the time of recruitment and how they understood the questions,  
277 however, by using validated tests, the support of trained interviewers, the use of  
278 supporting images so that they could answer about the type of acne they suffered from  
279 and other ways that ensured a better approach to the respondents, all this together shows

280 that we tried to minimize the bias to its minimum proportion. In addition, many  
281 adolescents were recruited, and although 3 crosstabs did not reach the necessary statistical  
282 power, only two of them had no association at the end of the analysis, so that the number  
283 of respondents was sufficient for the vast majority of the variable crosstabs that were  
284 raised.

285 **Conclusion:** Based on the above, it is concluded that those who had a medium or high  
286 repercussion due to acne were women, those of indigenous ethnicity, those who had scars  
287 on their face or those who had a parent or siblings affected by acne.

288 Author Contributions Conceptualization: EET, CASM and KCC

289 Data curation: CM, JA, EET, LIZ, and HNCR.

290 Formal analysis: CM, LIZ and JA.

291 Funding acquisition: KCC.

292 Methodology: EET, CASM and KCC

293 Writing – original draft: EET, CASM, LIZ, KCC, CM, and JA.

294 Writing – review & editing: all authors have read and agreed to the published version of  
295 the manuscript.

296 **Funding:** The current article processing charges (publication fees) were funded by the  
297 Facultad de Ciencias Médicas (FCM) (2-03-01-01), Universidad Nacional Autónoma de  
298 Honduras (UNAH), Tegucigalpa, MDC, Honduras, Central America (granted to Dr.  
299 Chinchilla).

300 **Institutional Review Board Statement:** The study was conducted under the Declaration  
301 of Helsinki. This research's preparation and execution fully complied with the  
302 fundamental ethical principles of autonomy, justice, beneficence, and non-maleficence.  
303 The Act Number (2020010), approved by the Ethics Committee in Biomedical Research



304 (CEIB) of the National Autonomous University of Honduras (UNAH), meeting of March  
305 20, 2020.

306 **Data Availability Statement:** The data presented in this study are available on request  
307 from the corresponding author.

308 **Acknowledgments:** All the MSS of the cohort October 2019 - October 2020 who  
309 accepted to participate in the project, to the directors of the healthcare centers in the areas  
310 that participated in the study, to the teachers of the UIC, for all the support provided in  
311 the review of the MSS assigned to each one. To Ovidio Padilla. who designed the online  
312 instrument and created the link for it, and Mauricio Gonzales for the data curation of the  
313 study.

314 **Conflicts of Interest:** The authors declare no conflict of interest.

#### 315 [Literature Cited](#)

316 1. Williams HC, Dellavalle RP, Garner S. Acne vulgaris. *Lancet* 2012; 379(9813):361–  
317 72.

318 2. Layton AM, Thiboutot D, Tan J. Reviewing the global burden of acne: how could we  
319 improve care to reduce the burden?\*. *Br J Dermatol* 2021; 184(2):219–25.

320 3. Tan JKL, Bhate K. A global perspective on the epidemiology of acne. *Br J Dermatol*  
321 2015; 172 Suppl 1:3–12.

322 4. Marta Szepietowska,<sup>1</sup> Alicja Dąbrowska,<sup>1</sup> Bernadetta Nowak,<sup>1</sup> Katarzyna  
323 Skinderowicz,<sup>1</sup> Bartosz Wilczyński,<sup>1</sup> Piotr K. Krajewski,<sup>2,\*</sup> and Alina Jankowska-  
324 Konsur<sup>2</sup>. Alexithymia in Adolescents with Acne: Association with Quality of Life  
325 Impairment and Stigmatization. *J Clin Med*. Feb 2022. Available from: URL:  
326 <https://www.ncbi.nlm.nih.gov/pmc/articles/PMC8837167/>.

327 5. WHO. Salud mental del adolescente; 2021 (consultado 2023). Available from: URL:  
328 <https://www.who.int/es/news-room/fact-sheets/detail/adolescent-mental-health>.

329 6. Gniewosz G, Gniewosz B. Psychological Adjustment During Multiple Transitions  
330 Between Childhood and Adolescence. *The Journal of Early Adolescence* 2019;  
331 40(4):566–98.

- 332 7. Jones EAK, Mitra AK, Bhuiyan AR. Impact of COVID-19 on Mental Health in  
333 Adolescents: A Systematic Review. *Int J Environ Res Public Health* 2021; 18(5).
- 334 8. Roosta N, Black DS, Peng D, Riley LW. Skin disease and stigma in emerging  
335 adulthood: impact on healthy development. *J Cutan Med Surg* 2010; 14(6):285–90.
- 336 9. Ritvo E, Del Rosso JQ, Stillman MA, La Riche C. Psychosocial judgements and  
337 perceptions of adolescents with acne vulgaris: A blinded, controlled comparison of adult  
338 and peer evaluations. *BioPsychoSocial Med* 2011; 5(1):11. Available from: URL:  
339 <https://bpsmedicine.biomedcentral.com/articles/10.1186/1751-0759-5-11>.
- 340 10. Leung AK, Barankin B, Lam JM, Leong KF, Hon KL. Dermatology: how to manage  
341 acne vulgaris. *Drugs Context* 2021; 10.
- 342 11. Gallitano SM, Berson DS. How Acne Bumps Cause the Blues: The Influence of Acne  
343 Vulgaris on Self-Esteem. *Int J Womens Dermatol* 2018; 4(1):12–7.
- 344 12. Gieler U, Gieler T, Kupfer JP. Acne and quality of life - impact and management. *J*  
345 *Eur Acad Dermatol Venereol* 2015; 29 Suppl 4:12–4.
- 346 13. Jerry Tan,<sup>1</sup> Stefan Beissert,<sup>2</sup> Fran Cook-Bolden,<sup>3</sup> Rajeev Chavda,<sup>4</sup> Julie Harper,<sup>5</sup>  
347 Adelaide Hebert,<sup>6</sup> Edward Lain,<sup>7</sup> Alison Layton,<sup>8</sup> Marco Rocha,<sup>9</sup> Jonathan Weiss,<sup>10</sup>  
348 and Brigitte Drénocorresponding author<sup>11</sup>. Impact of Facial Atrophic Acne Scars on  
349 Quality of Life: A Multi-country Population-Based Survey. *Am J Clin Dermatol* 2022.  
350 Available from: URL: <https://www.ncbi.nlm.nih.gov/pmc/articles/PMC8776674/>.
- 351 14. Gudiya, M S. Cecilia, Sujata Satapathy,<sup>1</sup> and M Ramam<sup>2</sup>. Assessment of Body Image  
352 Disturbance, Self-Esteem and Quality of Life among Adolescents and Young Adults with  
353 Acne in a Tertiary Care Facility of India. *Indian J Dermatol* Jan-feb 2022. Available from:  
354 URL: <https://www.ncbi.nlm.nih.gov/pmc/articles/PMC9154134/>.
- 355 15. Bosio Bonet M, Corball MV, Garay IS, Valente E, Ruiz-Lascano A. Epidemiología e  
356 impacto en la calidad de vida de los pacientes con acné juvenil. *Piel* 2022. Available from:  
357 URL: <https://www.sciencedirect.com/science/article/pii/S0213925122002192>.
- 358 16. Pantoja-Villa LF, Medina-Castillo DE, Avilés-Sánchez ME. Depresión y calidad de  
359 vida en pacientes con acné al inicio y al final del tratamiento. *Dermatología Revista*  
360 *Mexicana* 2019; 63(2):123–43.
- 361 17. Cerrato Hernández K, Enamorado B, Delgado L, Sierra M, Espinoza I, Martel B.  
362 Prevalencia de dermatosis en niños escolares de Honduras. *Medicina cutánea ibero-*

- 363 latino-americana 2016; 44:177–82. Available from: URL:  
364 <https://www.medigraphic.com/cgi-bin/new/resumen.cgi?IDARTICULO=70628>.
- 365 18. Espinoza-Turcios E, Gonzales-Romero RM, Sosa-Mendoza C, Sierra-Santos M,  
366 Castro-Ramos HN, Zambrano LI et al. Factors associated with hopelessness, depression  
367 and anxiety in the Honduran-Central America population during the COVID-19  
368 pandemic. *Front. Psychiatry* 2023; 14.
- 369 19. Cardiff University. Índice de discapacidad del acné de Cardiff; 2018. Available from:  
370 URL: [https://www.cardiff.ac.uk/medicine/resources/quality-of-life-](https://www.cardiff.ac.uk/medicine/resources/quality-of-life-questionnaires/cardiff-acne-disability-index)  
371 [questionnaires/cardiff-acne-disability-index](https://www.cardiff.ac.uk/medicine/resources/quality-of-life-questionnaires/cardiff-acne-disability-index).
- 372 20. Motley RJ, Finlay AY. Practical use of a disability index in the routine management  
373 of acne. *Clin Exp Dermatol* 1992; 17(1):1–3.
- 374 21. Abdelrazik YT, Ali FM, Salek MS, Finlay AY. Clinical experience and psychometric  
375 properties of the Cardiff Acne Disability Index (CADI). *Br J Dermatol* 2021; 185(4):711–  
376 24.
- 377 22. Ip A, Muller I, Geraghty AWA, Platt D, Little P, Santer M. Views and experiences of  
378 people with acne vulgaris and healthcare professionals about treatments: systematic  
379 review and thematic synthesis of qualitative research. *BMJ Open* 2021; 11(2):e041794.
- 380 23. Eyüboğlu M, Kalay I, Eyüboğlu D. Evaluation of Adolescents Diagnosed with Acne  
381 Vulgaris for Quality of Life and Psychosocial Challenges. *Indian J Dermatol* 2018;  
382 63(2):131–5.
- 383 24. Baker N, Billick SB. Psychiatric Consequences of Skin Conditions: Multiple Case  
384 Study Analysis with Literature Review. *Psychiatr Q* 2022; 93(3):841–7.
- 385 25. Hazarika N, Archana M. The Psychosocial Impact of Acne Vulgaris. *Indian J*  
386 *Dermatol* 2016; 61(5):515–20.
- 387 26. Szepletowski JC, Wolkenstein P, Veraldi S, Tennstedt D, Machovcová A, Delarue A.  
388 Acne across Europe: an online survey on perceptions and management of acne. *J Eur*  
389 *Acad Dermatol Venereol* 2018; 32(3):463–6.
- 390 27. El-Hamd MA, Nada EE-DA-A, Moustafa MA-K, Mahboob-Allah RA. Prevalence of  
391 acne vulgaris and its impact of the quality of life among secondary school-aged  
392 adolescents in Sohag Province, Upper Egypt. *J Cosmet Dermatol* 2017; 16(3):370–3.

- 393 28. Singh IP, Poonia K, Bajaj K. Quality of life in young adults with acne: Results of a  
394 cross-sectional study. *J Cosmet Dermatol* 2021; 20(12):4017–23.
- 395 29. Eichenfield DZ, Sprague J, Eichenfield LF. Management of Acne Vulgaris: A  
396 Review. *JAMA* 2021; 326(20):2055–67.
- 397 30. Tayel K, Attia M, Agamia N, Fadl N. Acne vulgaris: prevalence, severity, and impact  
398 on quality of life and self-esteem among Egyptian adolescents. *Journal of the Egyptian*  
399 *Public Health Association* 2020; 95(1):30.
- 400 31. Pathmarajah P, Peterknecht E, Cheung K, Elyoussfi S, Muralidharan V, Bewley A.  
401 Acne Vulgaris in Skin of Color: A Systematic Review of the Effectiveness and  
402 Tolerability of Current Treatments. *J Clin Aesthet Dermatol* 2022; 15(11):43–68.
- 403 32. Say Y-H, Heng AHS, Reginald K, Wong YR, Teh KF, Rawanan Shah SM et al.  
404 Modifiable and non-modifiable epidemiological risk factors for acne, acne severity and  
405 acne scarring among Malaysian Chinese: a cross-sectional study. *BMC Public Health*  
406 2021; 21(1):601.
- 407 33. Heng AHS, Say Y-H, Sio YY, Ng YT, Chew FT. Epidemiological Risk Factors  
408 Associated with Acne Vulgaris Presentation, Severity, and Scarring in a Singapore  
409 Chinese Population: A Cross-Sectional Study. *Dermatology* 2022; 238(2):226–35.
- 410 34. Heng AHS, Chew FT. Systematic review of the epidemiology of acne vulgaris. *Sci*  
411 *Rep* 2020; 10(1):5754.
- 412 35. Wolkenstein P, Machovcová A, Szepietowski JC, Tennstedt D, Veraldi S, Delarue A.  
413 Acne prevalence and associations with lifestyle: a cross-sectional online survey of  
414 adolescents/young adults in 7 European countries. *J Eur Acad Dermatol Venereol* 2018;  
415 32(2):298–306.
- 416 36. Tan J, Kang S, Leyden J. Prevalence and Risk Factors of Acne Scarring Among  
417 Patients Consulting Dermatologists in the USA. *J Drugs Dermatol* 2017; 16(2):97–102.
- 418 37. Kostecka M, Kostecka J, Szwed-Gułaga O, Jackowska I, Kostecka-Jarecka J. The  
419 Impact of Common Acne on the Well-Being of Young People Aged 15-35 Years and the  
420 Influence of Nutrition Knowledge and Diet on Acne Development. *Nutrients* 2022;  
421 14(24).

422 38. Kaikati J, Zoghaib S, Kechichian E, Stephan F, Helou J, Sleilaty G et al. The impact  
423 of acne treatment on quality of life and self-esteem: A prospective cohort study from  
424 Lebanon. *Int J Womens Dermatol* 2021; 7(4):415–21.

425
